# Supplementary material
Source: publisher figshare collection journal article supplement (https://acs.figshare.com/ndownloader/files/25373473)
Supplement: Supplementary file 1 [file 25373473]

## Electronic supplementary information

### Enhanced Mechanical Properties and Functional Performance of Cationic Waterborne Polyurethanes Enabled by Different Natural Phenolic Acids

*Yi Zhang<sup>ac</sup>, Wenbo Zhang<sup>a,c</sup>, Henghui Deng<sup>a,c</sup>, Weihao Zhang<sup>a,c</sup>, Jian Kang<sup>b</sup>, Chaoqun Zhang<sup>a,c,\*</sup>*

<sup>a</sup> Key Laboratory for Biobased Materials and Energy of Ministry of Education, College of Materials and Energy, South China Agricultural University, 483 Wushan Road, Guangzhou 510642, China

<sup>b</sup> State Key Laboratory of Rolling and Automation, Northeastern University, P. O. Box. 105, No. 11, Lane 3, Wenhua Road, Heping District, Shenyang 110819, Liaoning, China

<sup>c</sup> Guangdong Laboratory for Lingnan Modern Agricultural Science and Technology, 483 Wushan Road, Guangzhou 510642, China

\* Corresponding author. E-mail addresses: zhangcq@scau.edu.edu, nwpuzcq@gmail.com  
(Chaoqun Zhang)

**Number of pages: 4**

**Number of Figures: 4**

**Number of Tables: 1**

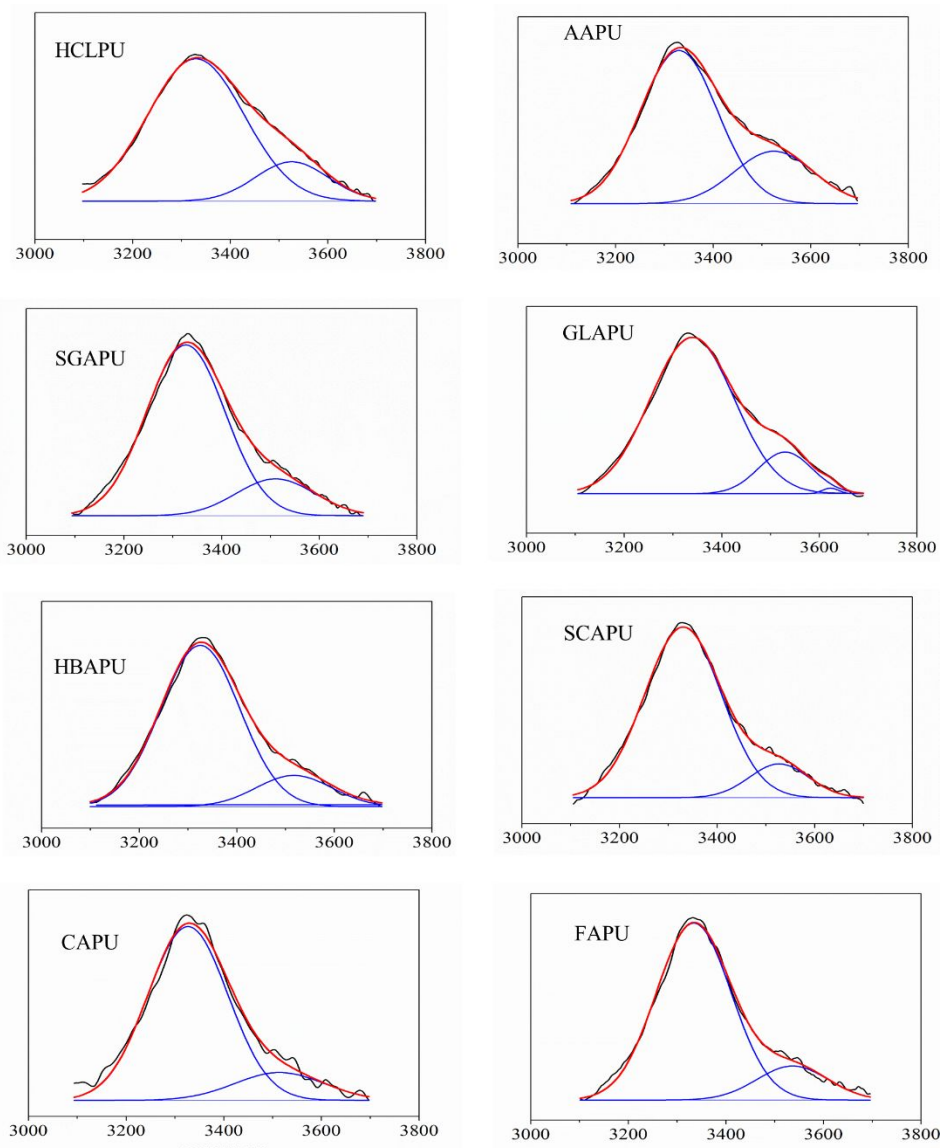

**Figure S1.** Curve-fitting results of the N-H of the ATR-FTIR spectra for CWPU (3100–3700  $\text{cm}^{-1}$ ). The value of R-Square in the curve-fitting results of the N-H bands is above 0.99.

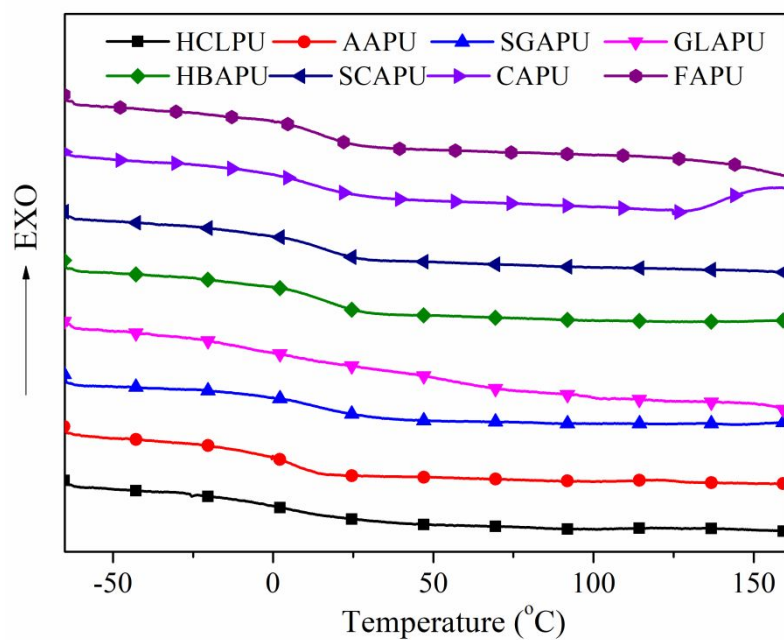

Figure S2. DCS thermograms of CWPU.

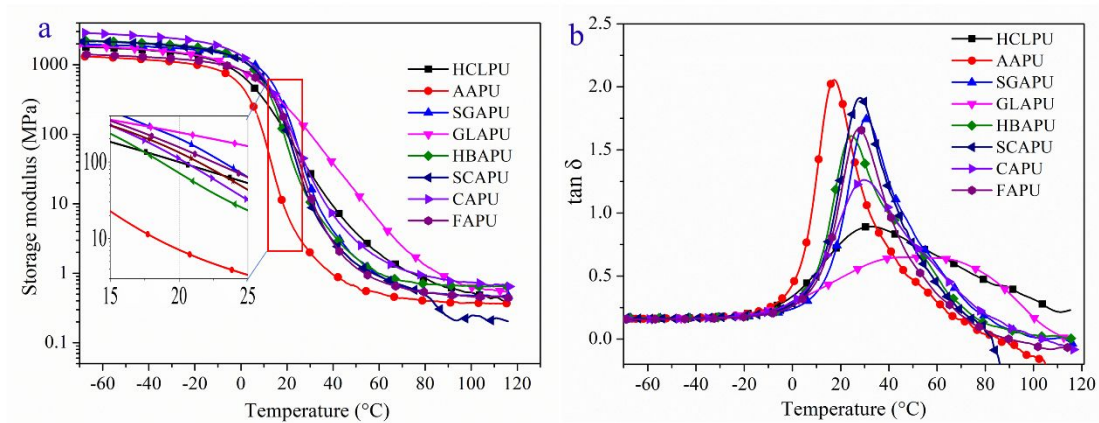

Figure S3. Dynamic-mechanical spectra of CWPU samples. a:  $E'$  vs.  $T$ ; b:  $\tan \delta$  vs.  $T$

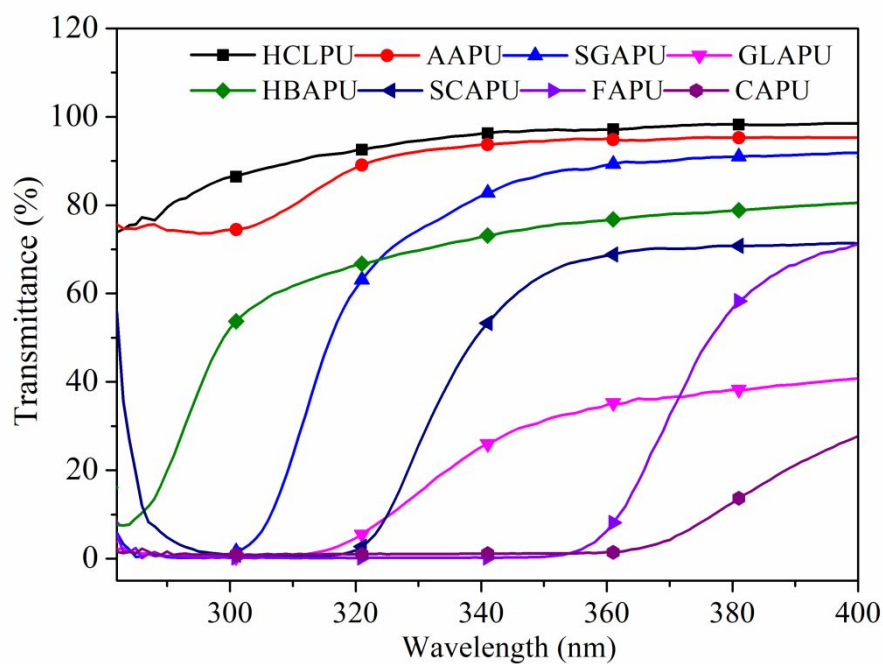

**Figure S4.** Transmittance of all the CWPU films with different neutralizers.

**Table S1.** Water absorption data and water contact angle of CWPU films.

| Sample | Water absorption<br>for 72 h (%) | Weight loss<br>(%) | Hydrophilic group<br>(mmol/g) | Water contact angle<br>after contacting 30 s<br>(°) |
|--------|----------------------------------|--------------------|-------------------------------|-----------------------------------------------------|
| HCLPU  | 160.8±2.4                        | 3.7±0.5            | 0.778                         | 73.35±3.46                                          |
| AAPU   | 8.6±0.1                          | 0.3±0.1            | 0.764                         | 44.12±1.10                                          |
| SGAPU  | 14.1±1.8                         | 1.4±0.5            | 0.691                         | 67.91±5.13                                          |
| GLAPU  | 12.1±0.7                         | 0.8±0.3            | 0.705                         | 72.45±2.61                                          |
| HBAPU  | 11.1±0.3                         | 3.6±0.2            | 0.721                         | 63.95±4.74                                          |
| SCAPU  | 8.2±1.0                          | 1.1±0.1            | 0.721                         | 72.35±4.18                                          |
| CAPU   | 9.9±0.5                          | 1.0±0.6            | 0.700                         | 65.90±1.96                                          |
| FAPU   | 8.6±2.1                          | 1.5±0.3            | 0.693                         | 80.83±3.42                                          |
